# Supplementary material for: Canine Intestinal Organoids as a Novel In Vitro Model of Intestinal Drug Permeability: A Proof-of-Concept Study
Source: Preprints.org preprint supplement (doi:10.20944/preprints202304.0101.v1), 2023-04-06
Supplement: Supplementary file 1 [file supplementary]

**Supplemental Table 1 – Quality Control Bias (%)**

| **Compound Name** | **pH** | **QC Level (ppm)** | **Average Measured Value (ppm)** | **Bias (%)** |
| --- | --- | --- | --- | --- |
| Atenolol | 6.8 | 25 | 23.1 | -7.41 |
| 7.4 | 25 | 23.8 | -4.60 |
| Metoprolol | 6.8 | 25 | 25.5 | 1.93 |
| 7.4 | 25 | 24.9 | -0.22 |
| Propranolol | 6.8 | 40 | 40.2 | 0.61 |
| 7.4 | 40 | 40.9 | 2.33 |

**Supplemental Table 1:** Average measured value of quality control samples for all 3 compounds and bias (%) at both buffer pH levels; minimum n=8 for all calculations
